# Supplementary material for: Anaerostipes hadrus, a butyrate-producing bacterium capable of metabolizing 5-fluorouracil
Source: PubMed Central journal article supplement (PMC11036815; doi:10.1128/msphere.00816-23), 2024-03-12

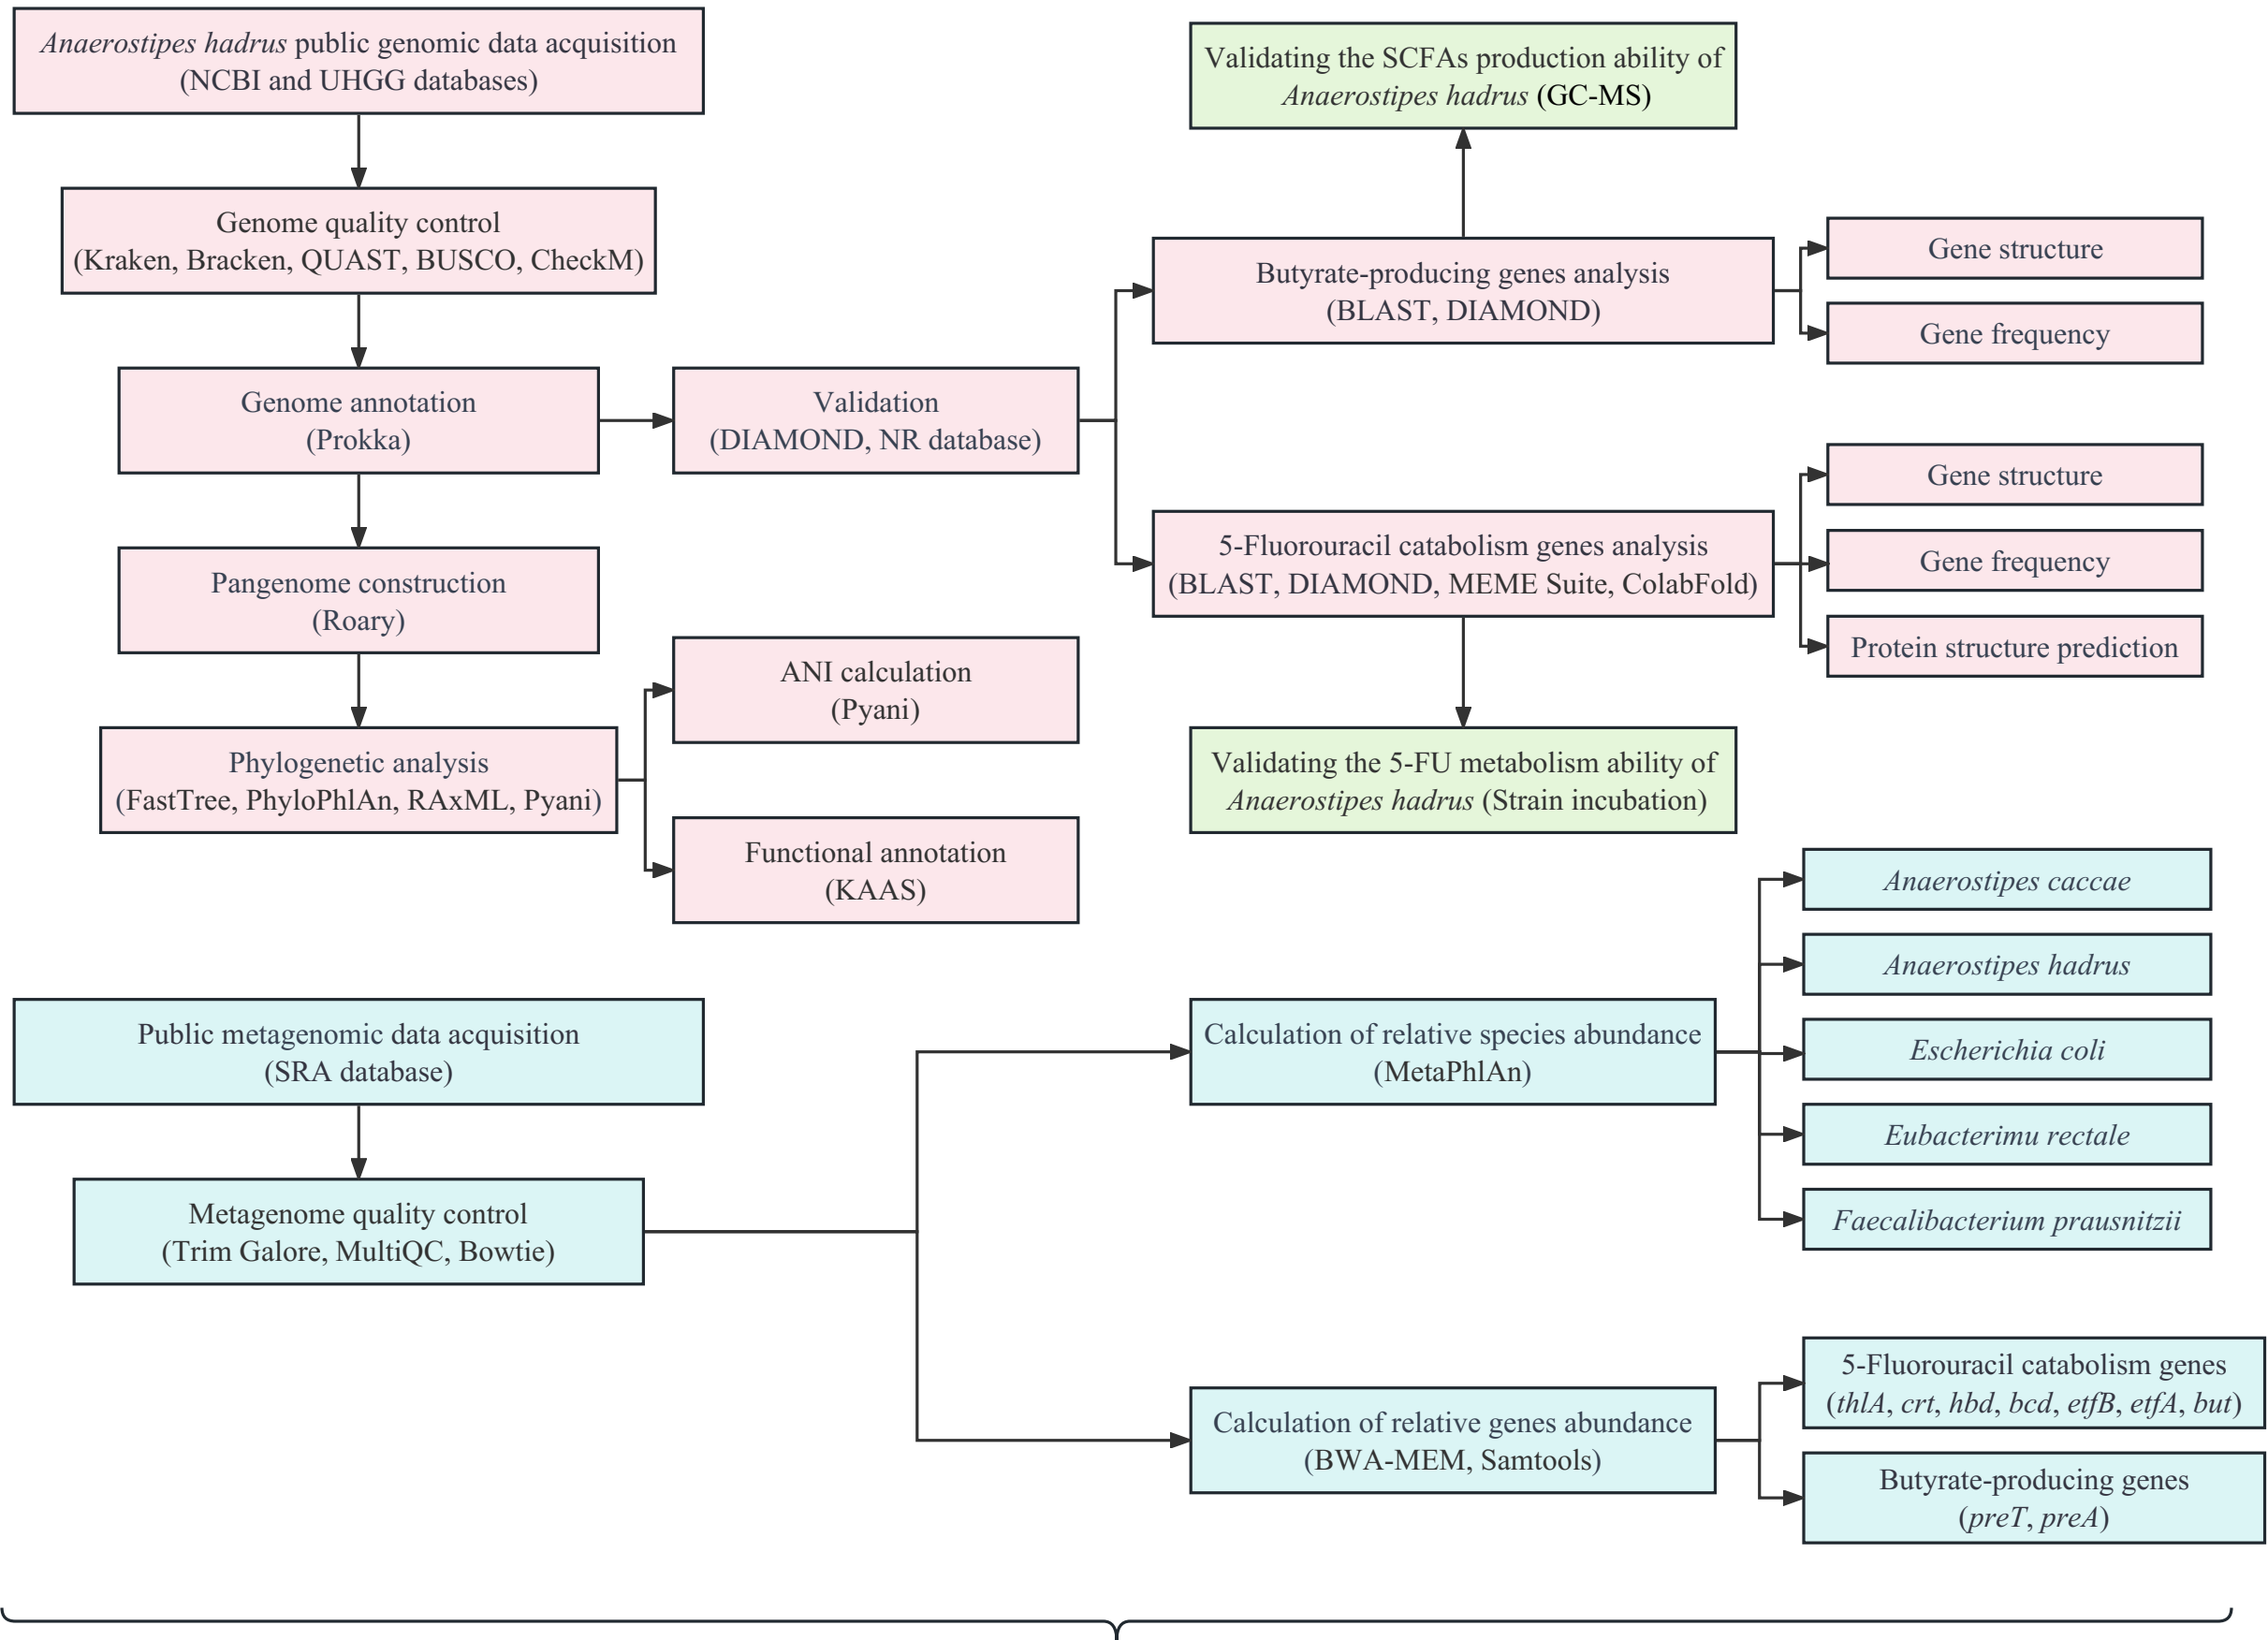

Describing the evolutionary relationships, functional characteristics, and prevalence of *Anaerostipes hadrus*

**A****No. of genes in the pan-genome**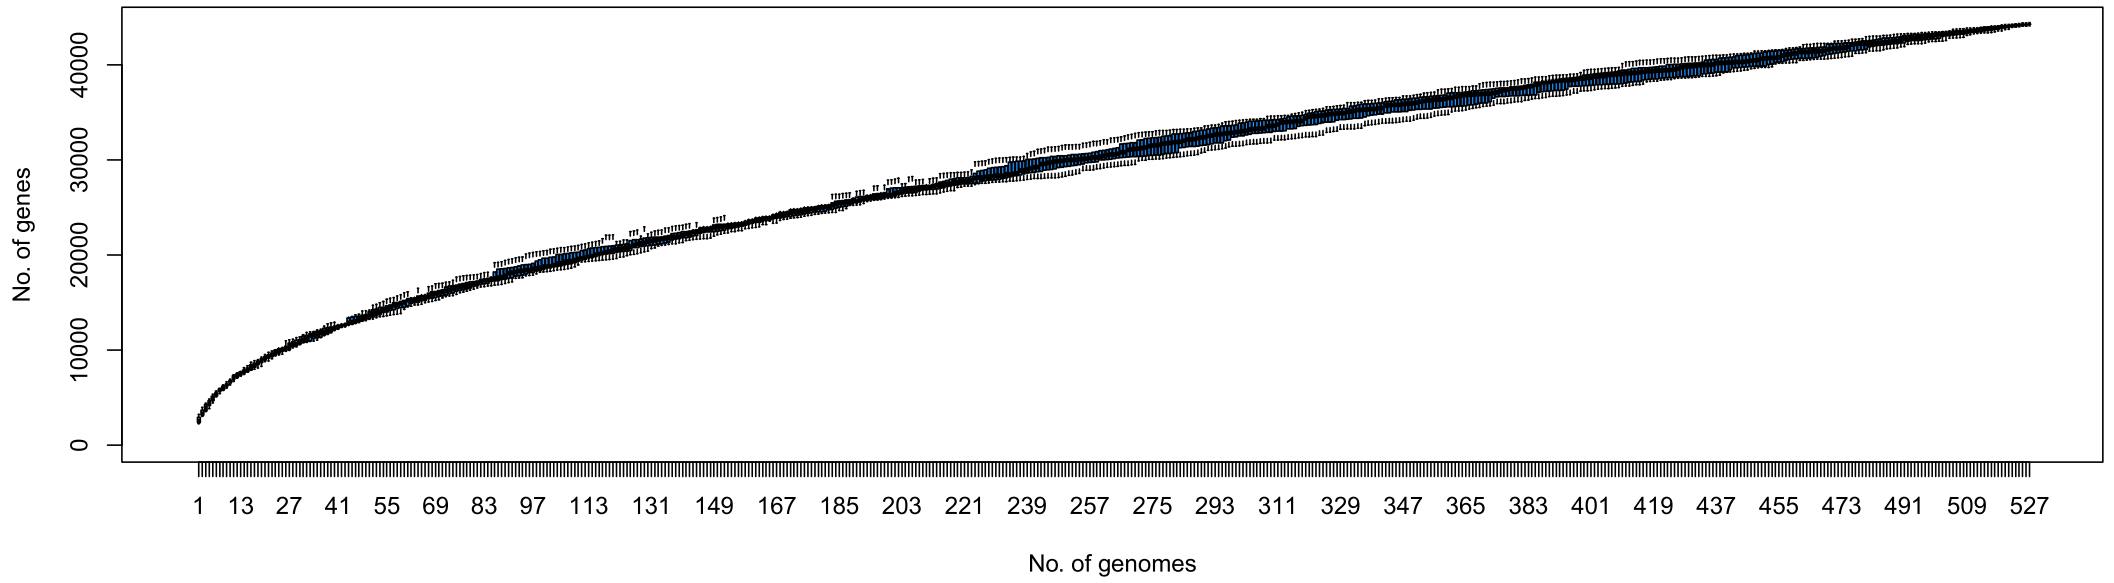**B****Number of new genes**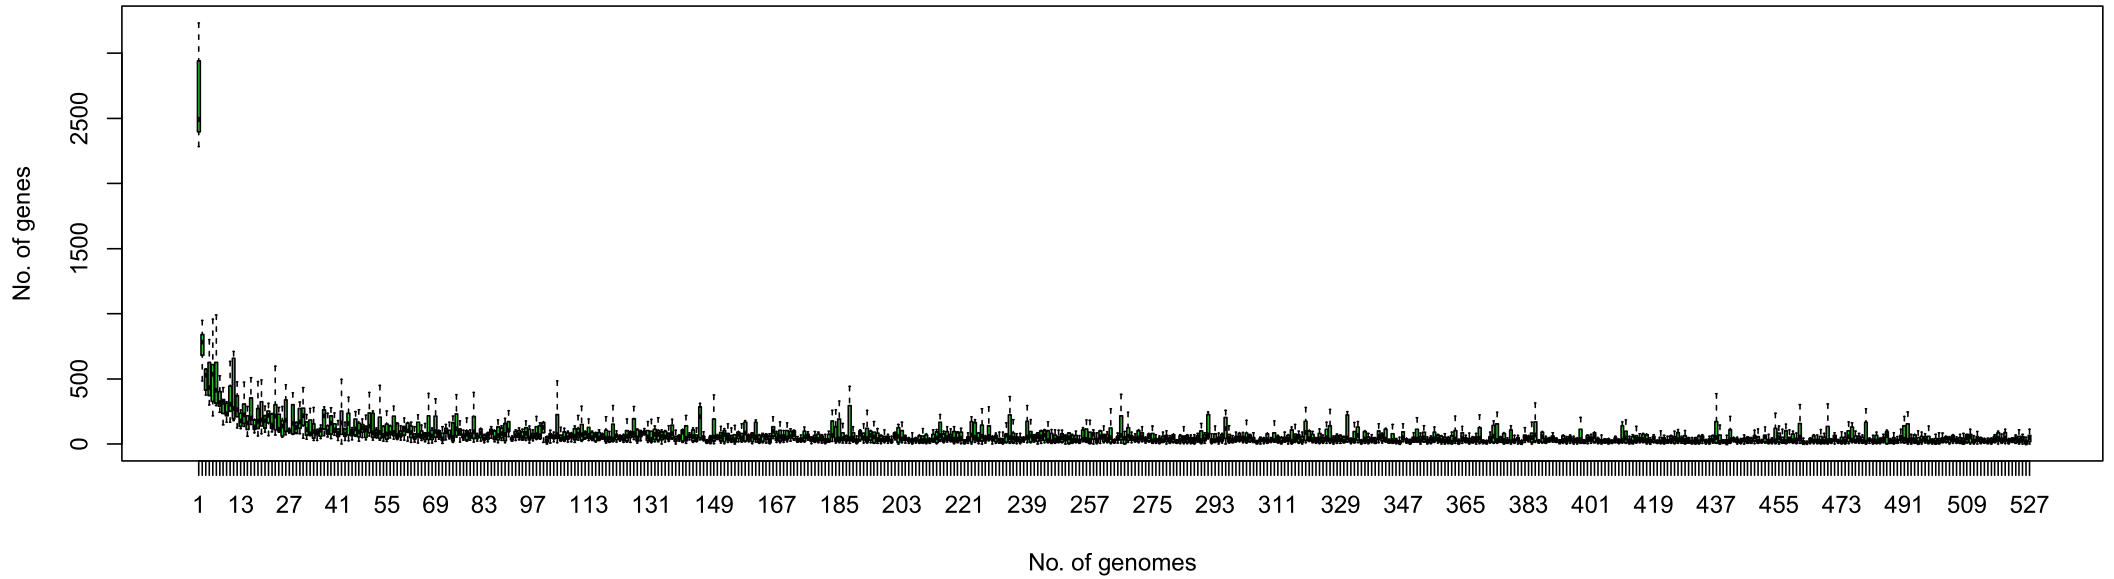

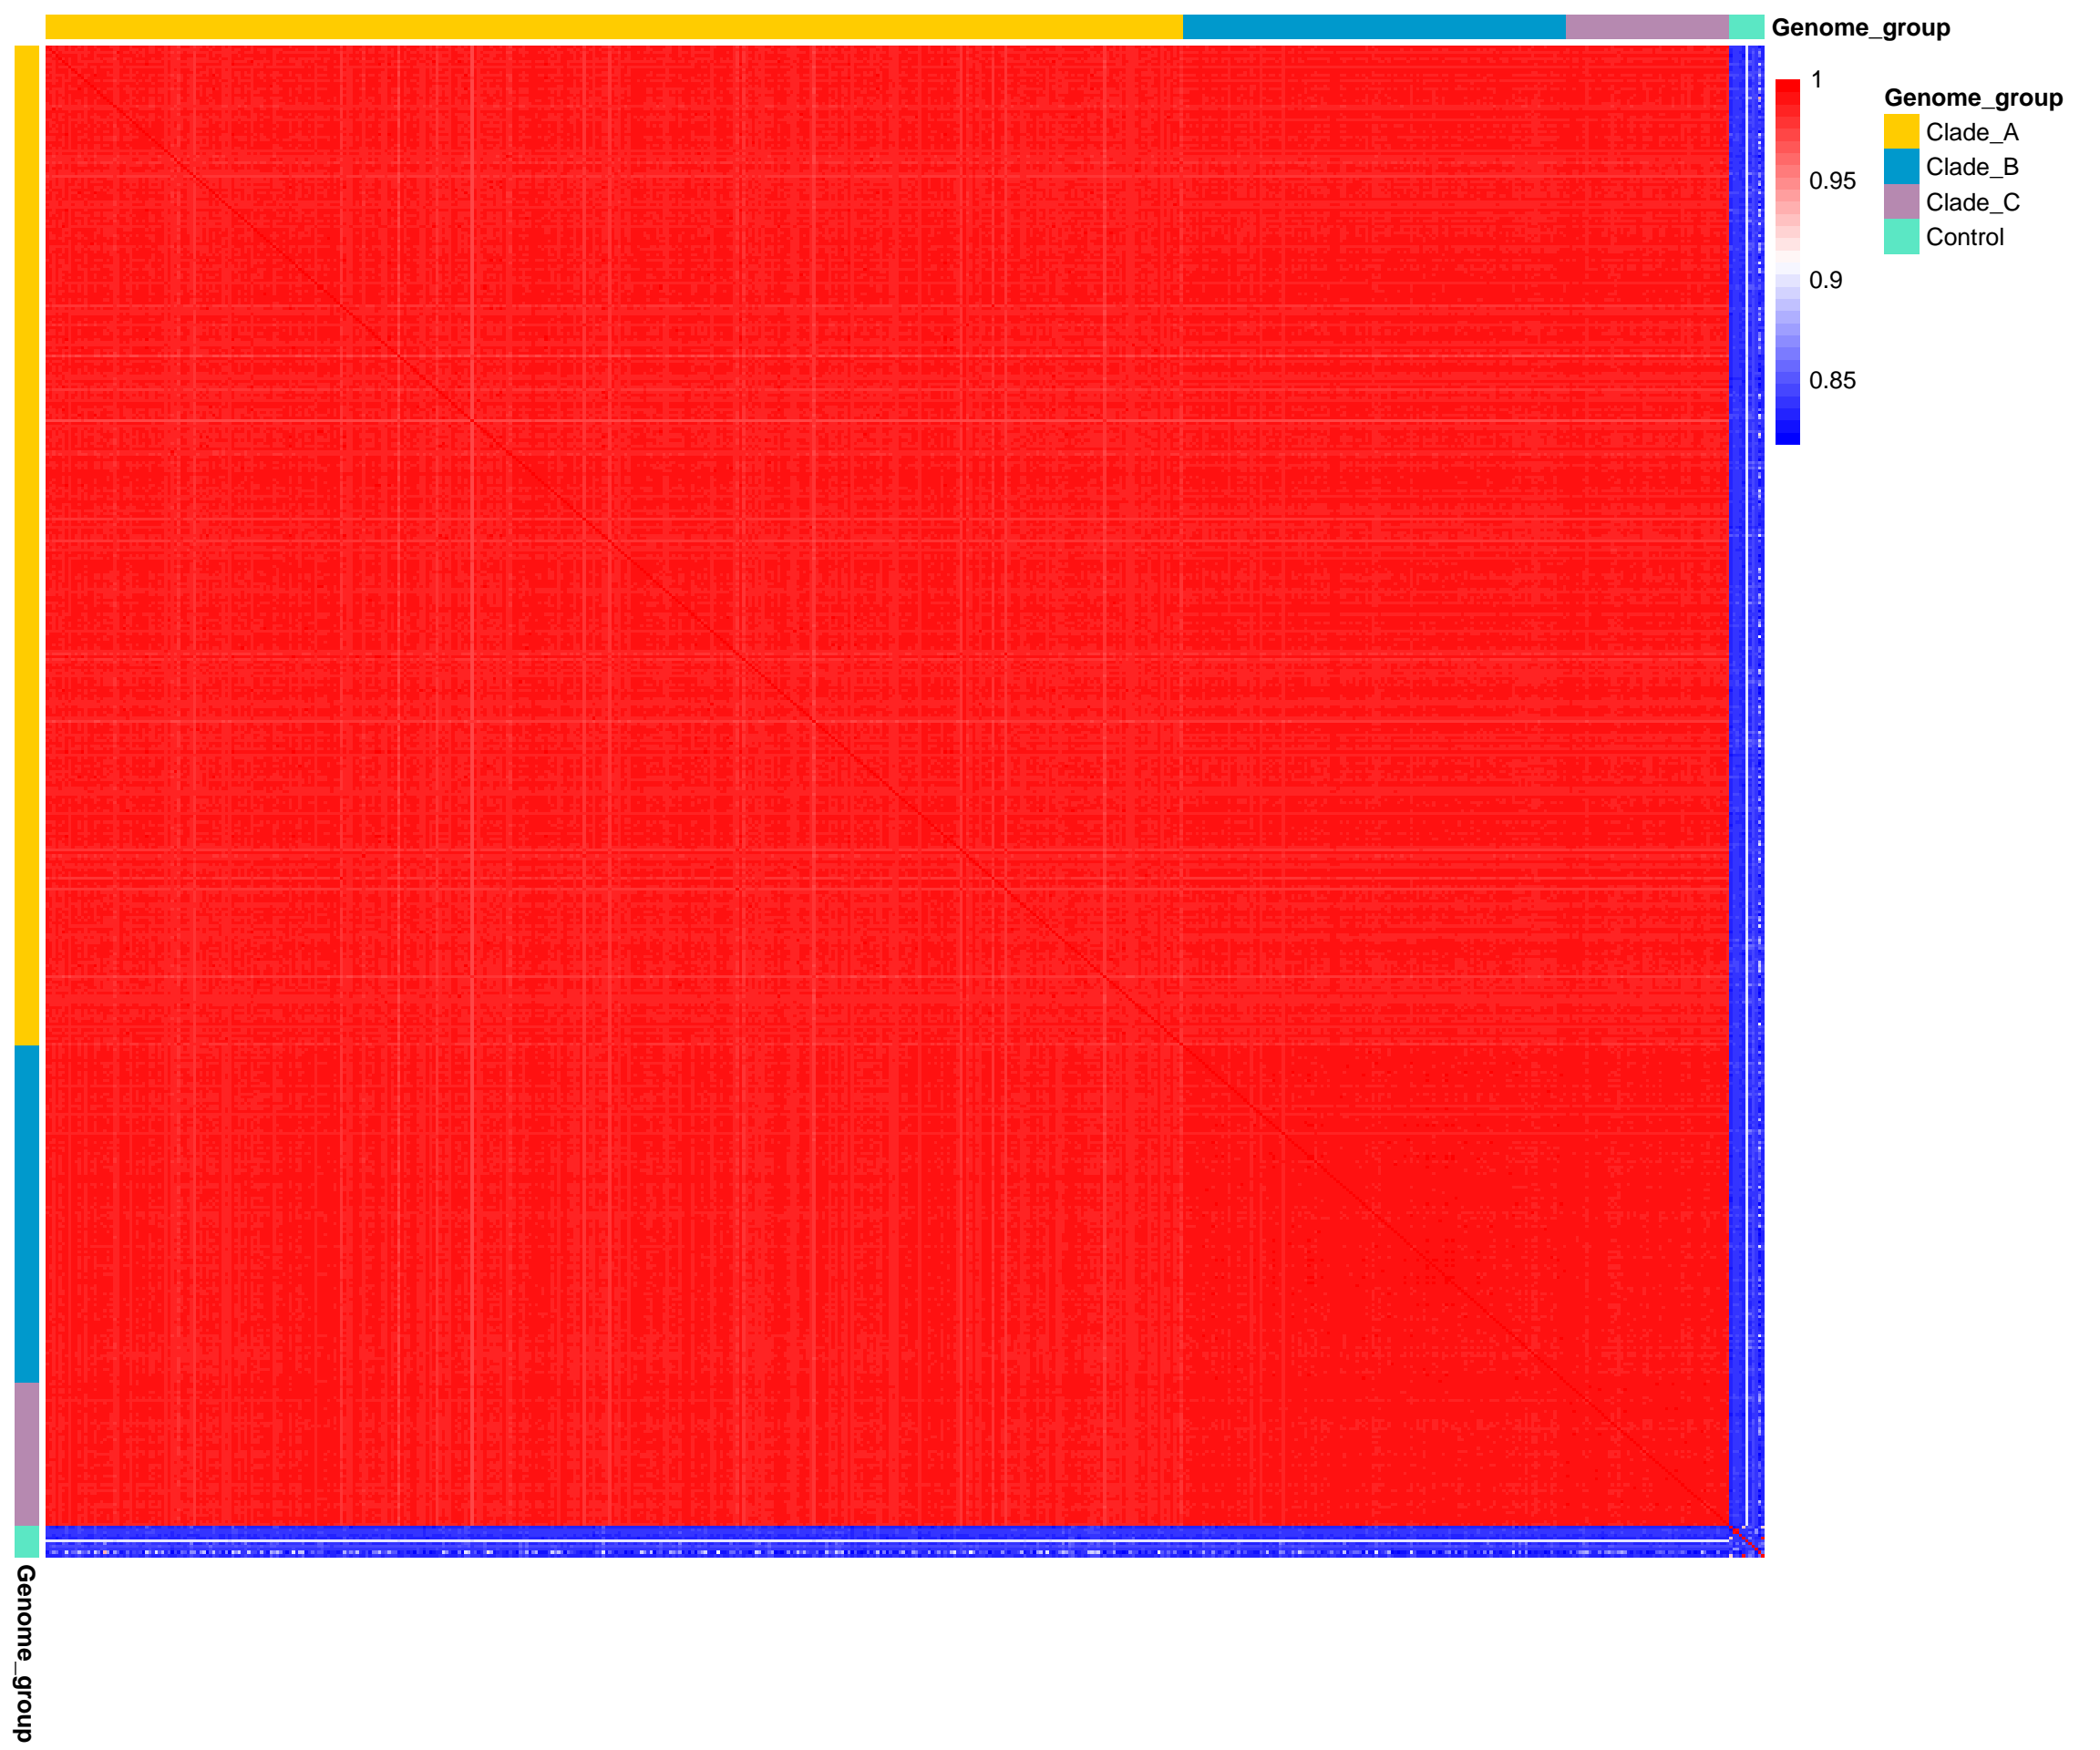

**A**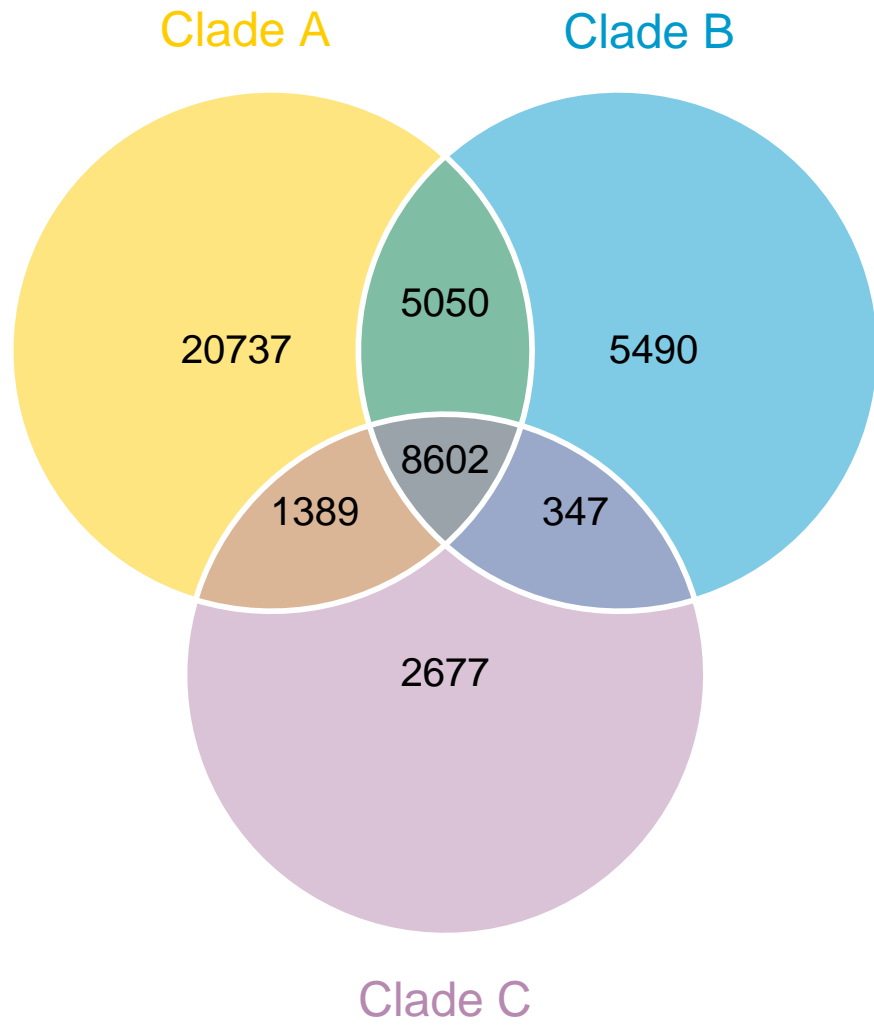**B**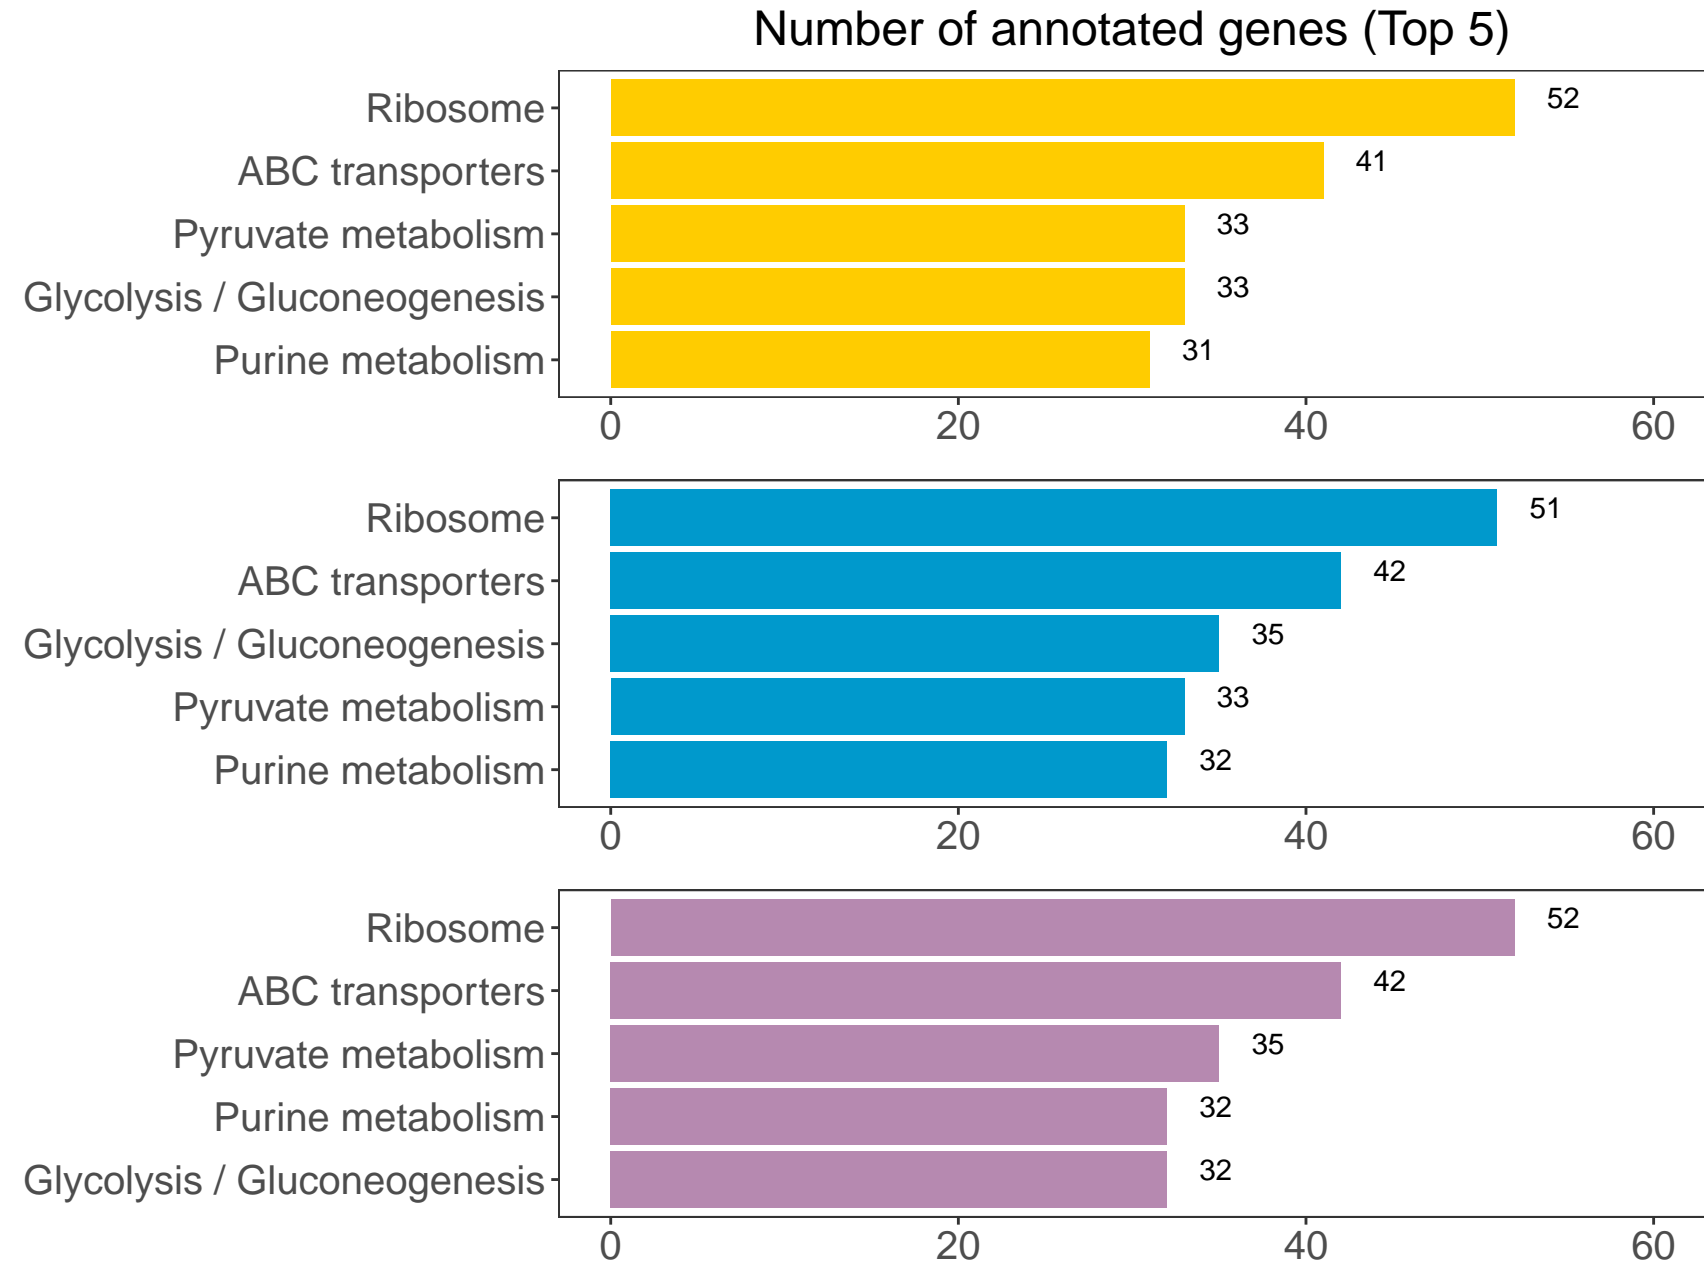

## Production of SCFAs by *A. hadrus*

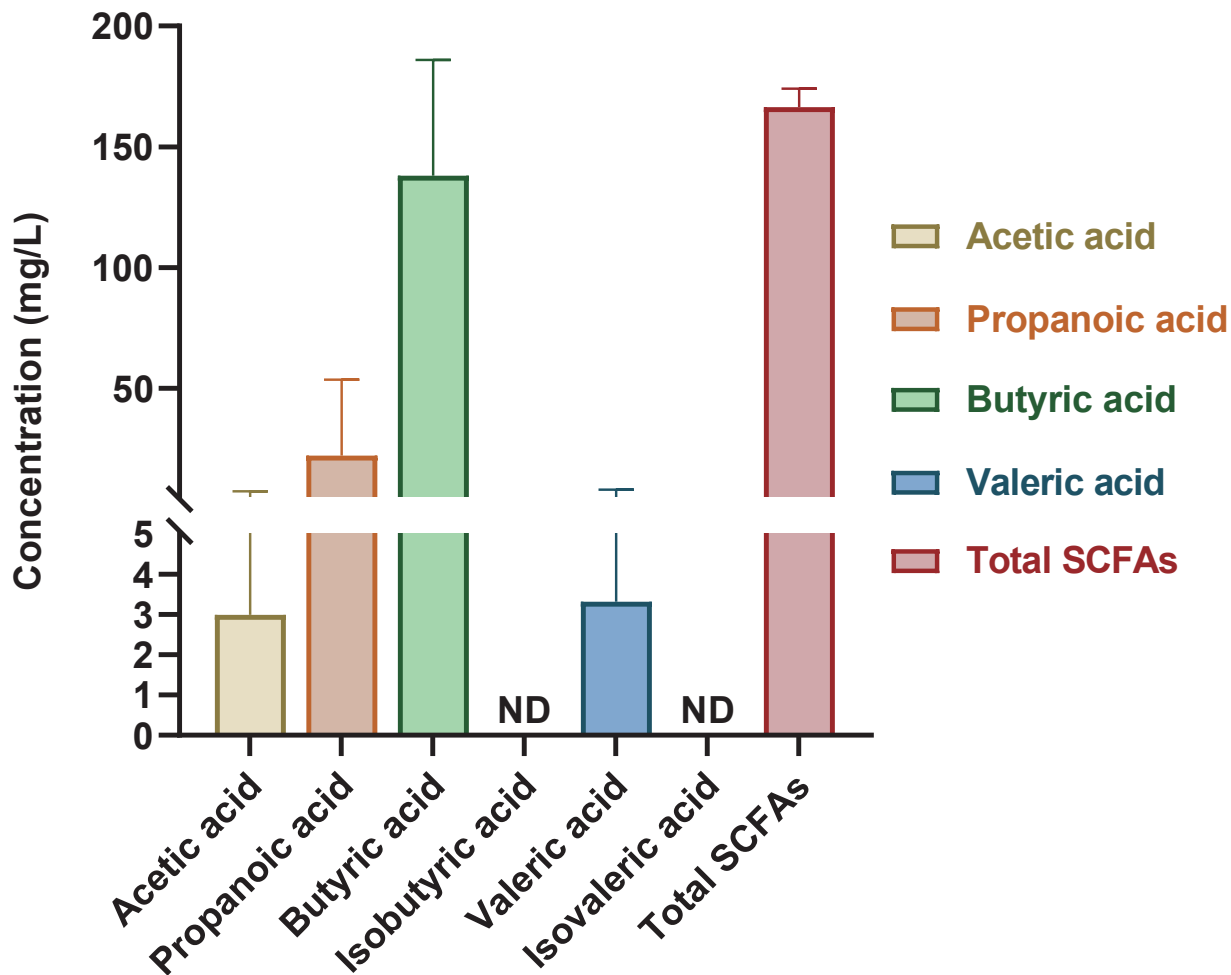

Supplement: msphere.00816-23-s0001.pdf [file msphere.00816-23-s0001.pdf]
