# Supplementary material for: Anaerostipes hadrus, a butyrate-producing bacterium capable of metabolizing 5-fluorouracil
Source: PubMed Central journal article supplement (PMC11036815; doi:10.1128/msphere.00816-23), 2024-03-12
Supplement: msphere.00816-23-s0007.pdf [file msphere.00816-23-s0007.pdf]

Structure-based amino acid sequence alignment between predicted *A. hadrus* PreT-PreA heterodimer and five pig DPD domains

| Alignment                 | Schematic Diagram                                                                 | Result                             | Sequence                                                                                                                                                                                                                                                                                                                                                                                                                                                                                                                                                                                                                                                                                  |
|---------------------------|-----------------------------------------------------------------------------------|------------------------------------|-------------------------------------------------------------------------------------------------------------------------------------------------------------------------------------------------------------------------------------------------------------------------------------------------------------------------------------------------------------------------------------------------------------------------------------------------------------------------------------------------------------------------------------------------------------------------------------------------------------------------------------------------------------------------------------------|
| Domain I<br>(nFeS1,nFeS2) | 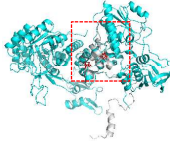 | RMSD = 0.786<br>(85 to 85 atoms)   | 21 TAMEEASRCLLCHDAPCSKSCPAKTPAKFIRSLRFRNIKGAEAETIRENNPLAGCCAEVCPYGGQLCEQACSRGTGIDK--PIEI<br>GKLQKFLVEMEK 113<br>71 GALREAMRCLKADAPCQKSCPTHLDIKSFITISLNKNYGAAKMIFSDNPLGLTLCGVCPPTSDLCVGGCNLYAIEEGSINI<br>GGLQQFASEVFK 164                                                                                                                                                                                                                                                                                                                                                                                                                                                                  |
| Domain II<br>(FAD)        |  | RMSD = 0.596<br>(116 to 116 atoms) | 128 GKIACVGAGPASLACARELALFGY--DVTIYEANEKAGVLYTYIVPSRLPQEVVDFDIATIEKLGVTFFKFNETIDAARL--E<br>ELKAE--YDAVFVGTGL 221 369 VFTGGDMVNGGKTVVQVAEAGKDAAMAIAAYLN 401<br>188 AKIALIAGPASTSCASFLARLGYSDITHEKQEYVGLSTSEIPQFRLPYDVVNFIEIEMKDLGVKICGKSLSENEITLN<br>TLKEEGYKAAFVIGL 285 476 VFAGGDIVGMANTVTSVNDGKQASWYIHKYI 508                                                                                                                                                                                                                                                                                                                                                                           |
| Domain III<br>(NADPH)     |  | RMSD = 2.284<br>(85 to 85 atoms)   | 242 DFLK--DARLNKENM-----TLGDTLVLVGGGDVAMDCVTTAKQLGAKAT--IVYRR--TIEEAPADIDEVMAVQSMGIP<br>IIQEFAPGELIGSKGHVTAMKFNGRD-----NESE--LTMKADQVVFVIG 353<br>308 DFLPLVAKSSKAGMCACHSPLPSIRGAVTVLAGDTPFCATSLRCCGARRVFLVFRKGFVNI RAVPEEVELAKEEKCEFLP<br>FL--SPRKYIVKGGRIYAVQFVRTEQDETGWNEIDEDQIVHLKADVYISAFG 439                                                                                                                                                                                                                                                                                                                                                                                       |
| Domain IV<br>(5-FU,FMN)   |  | RMSD = 0.619<br>(255 to 255 atoms) | 6 DLSIDFLGVKCEPNFFLSSEPVGSNYEMCAKALEAGWGGIYYKTIGIFI--PDECSPRFDITTKEGTPWVG--FKNMEQI<br>SDKPLEVNLVEMRRLKQDYPNKNIVASIMGSN--DEEWTLAKAVTEAGVDMIECNFSCPQMTSHAMGS--DVGQNPFLVKHYCEVVT<br>AATHLPVIAKMTPNIGNMEIPAIASMEGGAAGIAAINTVKAITNIDIENITAMPVVG--KSSISGYSAAVKPIALRFITQMKQH<br>PDLVDVPIITVGGIETWRDALEFVLVGASNLQVTTAVMQGYRIVEDMISGLSHYMEDN 308<br>532 DISVEMAGLKFINPPGLASAAPTTSSMIRRAFEAGWGFALIKTFSLDKDIYVTVNSPRIVRGTTSGPMYGPQGSSFLNIELI<br>SEKTAAYWCQSVTELKADFPDNIIVIASIMCSYKNDIMELSRKAEASGADALELN SAPHGMGERGMGLACGQDPFLVRNICRWRV<br>QAVQIPFFAKLTPNVTDIVSITARAAGEGADVTA TNTVSLMGLKADGTPW--PAVGAGKRTTYGGVGSATAIRPIALRAVTTIARA<br>--LFGPFLATGCSIDSAESGLQFLHSGASVLQVCSAVQNQDFTVIQDYCTGLKALLYLK 841 |
| Domain V<br>(cFeS1,cFeS2) |  | RMSD = 1.023<br>(79 to 79 atoms)   | 313 LSDLVGLALPNIVPAEDLDRSFKLLPKFDEDA CAGCGRCYVSCFDGGHQAIWDDEEARRPLNTDKCVGCHLCLNVCPVMDC<br>I 395<br>921 IKDVIKALQYLGTGFELSNIEQVAVVIDEEMCINCGKCYMTCDNSGYQAIQFDPETHLPTVTD--TCTGCTLCLSVCPIDC<br>I 1002                                                                                                                                                                                                                                                                                                                                                                                                                                                                                        |
